# Supplementary material for: Systemic Administration of Pegylated Arginase-1 Attenuates the Progression of Diabetic Retinopathy
Source: MDPI journal article supplement (doi:10.3390/cells11182890), 2022-09-16

**Supplemental Figure S1. Evidence for the presence of PEG-Arg1 [ $>250$  kD] in the neural retina of db/db mice. (A)** Western blot of retinal expression of PEG-Arg1 [ $>250$  kD] in db/db mouse treated with either PEG alone or PEG-Arg1. PEG-A1 expression is observed as a slightly diffuse band at  $>250$  kD. **(B)** Frozen cross sections of the retinas at the head of the optic nerve were stained for PEG, CD31 (marker of endothelial cells) and DAPI (cell bodies).

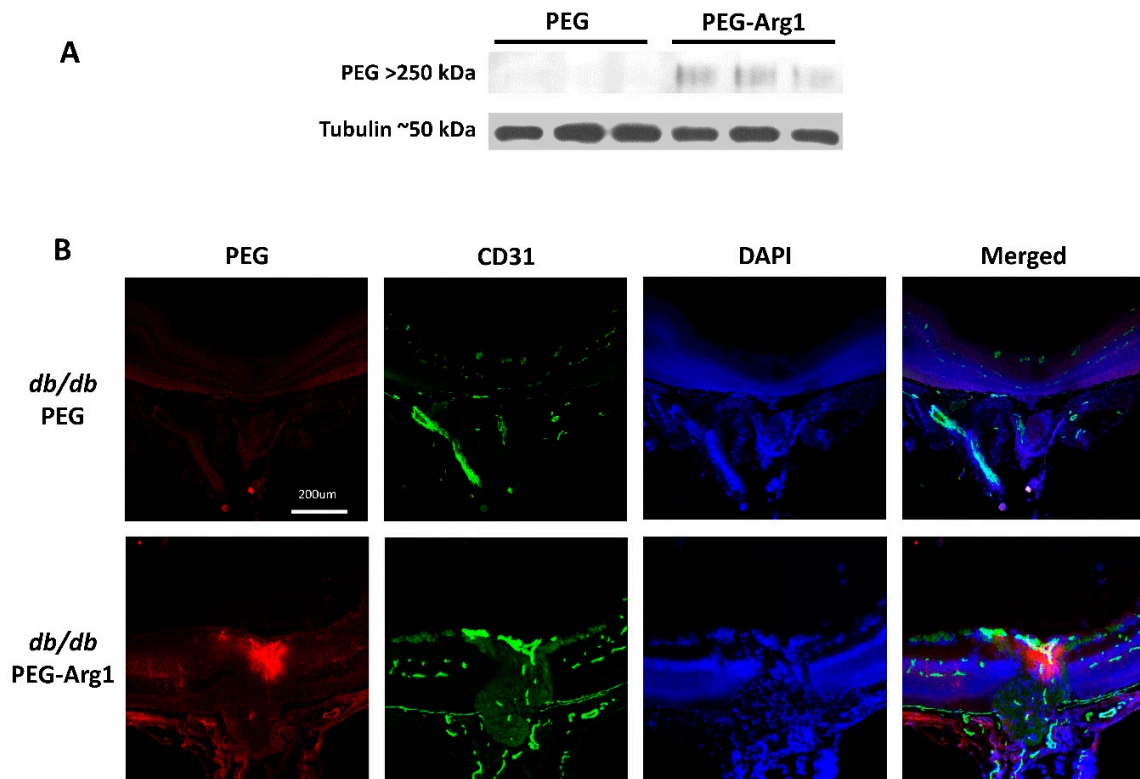

Supplement: s1 [file s1]
